# Supplementary material for: Antibody responses to the BNT162b2 mRNA vaccine in individuals previously infected with SARS-CoV-2
Source: PubMed Central journal article supplement (PMC8205849; doi:10.1038/s41591-021-01325-6), 2021-04-01
Supplement: 41591_2021_1325_MOESM1_ESM.pdf [file 41591_2021_1325_MOESM1_ESM.pdf]

**Supplementary information**

---

**Antibody responses to the BNT162b2 mRNA vaccine in individuals previously infected with SARS-CoV-2**

---

In the format provided by the authors and unedited

## SUPPLEMENTARY MATERIAL

**Supplementary Table 1. Comparison of antibody levels between participants with and without prior SARS-CoV-2 infection at matched time points.** Values are shown as median and interquartile range [IQR], with comparisons performed using two-sided Wilcoxon tests. Sample sizes at baseline, After Dose 1, and After Dose 2 included: N=903, N=490, and N=228 for infection naïve persons; and N=78, N=35, and N=11 for persons with prior infection.

|                        | No Prior Infection | Prior Infection     | P value |
|------------------------|--------------------|---------------------|---------|
| <b>Log IgG(S-RBD)</b>  |                    |                     |         |
| Baseline               | 0.6 [0.2, 1.2]     | 6.0 [4.6, 6.9]      | <0.001  |
| After Dose 1           | 7.0 [6.3, 7.6]     | 10.0 [9.2, 10.4]    | <0.001  |
| After Dose 2           | 9.9 [9.4, 10.3]    | 10.6 [10.3, 10.7]   | <0.001  |
| <b>Log IgG(N)</b>      |                    |                     |         |
| Baseline               | -3.9 [-4.6, -3.2]  | 0.6 [-0.5, 1.2]     | <0.001  |
| After Dose 1           | -2.8 [-3.9, -1.7]  | 0.6 [-0.1, 1.2]     | <0.001  |
| After Dose 2           | -2.7 [-3.7, -1.3]  | 1.0 [0.2, 1.1]      | <0.001  |
| <b>Log IgM(S)</b>      |                    |                     |         |
| Baseline               | -3.2 [-3.5, -2.7]  | -0.3 [-1.4, 0.8]    | <0.001  |
| After Dose 1           | 0.1 [-0.8, 0.8]    | 0.1 [-0.4, 1.0]     | 0.43    |
| After Dose 2           | 0.7 [-0.1, 1.3]    | -0.1 [-0.6, 1.4]    | 0.59    |
| <b>ACE2 binding, %</b> |                    |                     |         |
| After Dose 1           | 42.5 [26.1, 58.0]  | 99.6 [97.4, 100.0]  | <0.001  |
| After Dose 2           | 98.6 [96.9, 99.2]  | 100.0 [99.0, 100.0] | <0.001  |

**Supplementary Table 2. Comparison of antibody levels between participants with and without prior SARS-CoV-2 infection at shifted time points.** Values are shown as median and interquartile range [IQR], with comparisons performed using two-sided Wilcoxon tests. Sample sizes at baseline, After Dose 1, and After Dose 2 included: N=903, N=490, and N=228 for infection naïve persons; and N=78, N=35, and N=11 for persons with prior infection.

|                 | <b>No Prior Infection</b>  | <b>Prior Infection</b>     | <b>P value</b> |
|-----------------|----------------------------|----------------------------|----------------|
|                 | <b><i>After Dose 1</i></b> | <b><i>At Baseline</i></b>  |                |
| Log IgG(S-RBD)  | 7.0 [6.3, 7.6]             | 6.0 [4.6, 6.9]             | <0.001         |
| Log IgG(N)      | -2.8 [-3.9, -1.7]          | 0.6 [-0.5, 1.2]            | <0.001         |
| Log IgM(S)      | 0.1 [-0.8, 0.8]            | -0.3 [-1.4, 0.8]           | 0.09           |
|                 | <b><i>After Dose 2</i></b> | <b><i>After Dose 1</i></b> |                |
| Log IgG(S-RBD)  | 9.9 [9.4, 10.3]            | 10.0 [9.2, 10.4]           | 0.92           |
| Log IgG(N)      | -2.7 [-3.6, -1.3]          | 0.6 [-0.1, 1.2]            | <0.001         |
| Log IgM(S)      | 0.7 [-0.1, 1.3]            | 0.1 [-0.4, 1.0]            | 0.050          |
| ACE2 binding, % | 98.6 [96.9, 99.2]          | 99.6 [97.4, 100.0]         | <0.001         |

**Supplementary Table 3. Sensitivity analysis comparing antibody levels between participants with and without prior SARS-CoV-2 infection at matched time points.** Values are shown as median and interquartile range [IQR], with comparisons performed using two-sided Wilcoxon tests. The sample with data available at all time points included N=207 infection naïve persons and N=10 with prior infection.

|                        | No Prior Infection | Prior Infection     | P value |
|------------------------|--------------------|---------------------|---------|
| <b>Log IgG(S-RBD)</b>  |                    |                     |         |
| Baseline               | 0.7 [0.2, 1.2]     | 5.9 [2.7, 7.2]      | <0.001  |
| After Dose 1           | 7.0 [6.2, 7.6]     | 10.2 [8.4, 10.5]    | <0.001  |
| After Dose 2           | 9.9 [9.4, 10.3]    | 10.6 [10.3, 10.8]   | 0.001   |
| <b>Log IgG(N)</b>      |                    |                     |         |
| Baseline               | -3.9 [-4.6, -3.0]  | 0.7 [0.1, 1.0]      | <0.001  |
| After Dose 1           | -2.7 [-3.9, -1.6]  | 0.8 [-0.1, 1.2]     | <0.001  |
| After Dose 2           | -2.7 [-3.9, -1.3]  | 0.9 [0.0, 1.1]      | <0.001  |
| <b>Log IgM(S)</b>      |                    |                     |         |
| Baseline               | -3.2 [-3.5, -2.7]  | -1.2 [-1.9, 0.5]    | <0.001  |
| After Dose 1           | 0.0 [-0.7, 0.7]    | 0.1 [-0.2, 1.0]     | 0.49    |
| After Dose 2           | 0.7 [-0.1, 1.3]    | -0.2 [-0.7, 1.1]    | 0.24    |
| <b>ACE2 binding, %</b> |                    |                     |         |
| After Dose 1           | 42.1 [26.3, 58.8]  | 99.9 [77.3, 100.0]  | <0.001  |
| After Dose 2           | 98.6 [96.9, 99.2]  | 100.0 [99.0, 100.0] | 0.001   |

**Supplementary Table 4. Sensitivity analysis comparing antibody levels between participants with and without prior SARS-CoV-2 infection at shifted time points.** Values are shown as median and interquartile range [IQR], with comparisons performed using two-sided Wilcoxon tests. The sample with data available at all time points included N=207 infection naïve persons and N=10 with prior infection.

|                 | <b>No Prior Infection</b>  | <b>Prior Infection</b>     | <b>P value</b> |
|-----------------|----------------------------|----------------------------|----------------|
|                 | <i><b>After Dose 1</b></i> | <i><b>At Baseline</b></i>  |                |
| Log IgG(S-RBD)  | 7.0 [6.2, 7.6]             | 5.9 [2.7, 7.2]             | 0.050          |
| Log IgG(N)      | -2.7 [-3.9, -1.6]          | 0.7 [0.1, 1.0]             | 0.001          |
| Log IgM(S)      | 0.0 [-0.7, 0.7]            | -1.2 [-1.9, 0.5]           | 0.08           |
|                 | <i><b>After Dose 2</b></i> | <i><b>After Dose 1</b></i> |                |
| Log IgG(S-RBD)  | 9.9 [9.4, 10.3]            | 10.2 [8.4, 10.5]           | 0.58           |
| Log IgG(N)      | -2.7 [-3.9, -1.3]          | 0.8 [-0.1, 1.2]            | <0.001         |
| Log IgM(S)      | 0.7 [-0.1, 1.3]            | 0.1 [-0.2, 1.0]            | 0.31           |
| ACE2 binding, % | 98.6 [96.9, 99.2]          | 99.9 [77.3, 100.0]         | 0.033          |

**Supplementary Table 5. Comparison of proportions (%) of Anti-Spike Receptor Binding Domain IgG antibody levels  $\geq 4160$  AU/mL between participants with and without prior SARS-CoV-2 infection.** We use two-sided Chi-Square tests with the Yate's correction to conduct between-group comparisons, without adjustment for multiple testing. Sample sizes at baseline, after dose 1, and after dose 2 included: N=903, N=490, and N=228 for infection naïve persons; and N=78, N=35, and N=11 for persons with prior infection.

|                                                | No Prior Infection  | Prior Infection     | P value |
|------------------------------------------------|---------------------|---------------------|---------|
| <b>Matched time points</b>                     |                     |                     |         |
| <b>IgG(S-RBD) <math>\geq 4160</math> AU/mL</b> | <b>n/N (%)</b>      | <b>n/N (%)</b>      |         |
| Baseline                                       | 0/903 (0.0%)        | 6/78 (7.7%)         | <0.001  |
| After Dose 1                                   | 37/490 (7.6%)       | 27/35 (77.1%)       | <0.001  |
| After Dose 2                                   | 221/227 (97.4%)     | 11/11 (100.0%)      | 1.00    |
| <b>Shifted time points</b>                     |                     |                     |         |
|                                                | <b>After Dose 1</b> | <b>At Baseline</b>  |         |
| IgG(S-RBD) $\geq 4160$                         | 37/490 (7.6%)       | 6/78 (7.7%)         | 1.00    |
|                                                | <b>After Dose 2</b> | <b>After Dose 1</b> |         |
| IgG(S-RBD) $\geq 4160$                         | 221/227 (97.4%)     | 27/35 (77.1%)       | <0.001  |

**Supplementary Table 6. Comparison of proportions (%) of ACE2 binding  $\geq 50\%$  between participants with and without prior SARS-CoV-2 infection.** We use two-sided Chi-Square tests with the Yate's correction to conduct between-group comparisons, without adjustment for multiple testing. Sample sizes after dose 1 and after dose 2 included: N=490, and N=228 for infection naïve persons; and N=35, and N=11 for persons with prior infection.

|                                           | No Prior Infection  | Prior Infection     | P value |
|-------------------------------------------|---------------------|---------------------|---------|
| <b>Matched time points</b>                |                     |                     |         |
| <b>ACE binding <math>\geq 50\%</math></b> | <b>n/N (%)</b>      | <b>n/N (%)</b>      |         |
| After Dose 1                              | 183/490 (37.3%)     | 33/35 (94.3%)       | <0.001  |
| After Dose 2                              | 223/228 (97.8%)     | 11/11 (100.0%)      | 1.00    |
| <b>Shifted time points</b>                |                     |                     |         |
|                                           | <b>After Dose 2</b> | <b>After Dose 1</b> |         |
| ACE binding $\geq 50\%$                   | 223/228 (97.8%)     | 33/35 (94.3%)       | 0.52    |

**Supplementary Table 7. Significant post-vaccine symptoms by SARS-CoV-2 infection status following dose 1 and dose 2 of mRNA vaccine.** We use two-sided Chi-Square tests with the Yate's correction to conduct between-group comparisons, without adjustment for multiple testing. We defined a post-vaccine symptom reaction as significant if reported as a non-injection site symptom that was: (i) moderate to severe in degree and lasting <2 days, or (ii) of any severity and lasting >2 days.

|                     | <b>No Prior Infection<br/>(n=893)</b> | <b>Prior Infection<br/>(n=76)</b> | <b>P value</b> |
|---------------------|---------------------------------------|-----------------------------------|----------------|
| After Dose 1, n (%) | 223 (25.0%)                           | 28 (36.8%)                        | 0.033          |
| After Dose 2, n (%) | 524 (58.7%)                           | 39 (51.3%)                        | 0.259          |

**Supplementary Table 8. Significant post-vaccine symptoms following first and second mRNA vaccine doses by SARS-CoV-2 infection status.** We use two-sided Chi-Square tests with the Yate's correction to conduct between-group comparisons, without adjustment for multiple testing. We defined a post-vaccine symptom reaction as significant if reported as a non-injection site symptom that was: (i) moderate to severe in degree and lasting <2 days, or (ii) of any severity and lasting >2 days.

|                       | <b>No Prior Infection<br/>After Dose 2<br/>(n=893)</b> | <b>Prior Infection<br/>After Dose 1<br/>(n=76)</b> | <b>P value</b> |
|-----------------------|--------------------------------------------------------|----------------------------------------------------|----------------|
| Reactogenicity, n (%) | 524 (58.7%)                                            | 28 (36.8%)                                         | <0.001         |

**Supplementary Table 9. Significant post-vaccine symptoms by dose (first and second) of mRNA vaccine stratified by prior SARS-CoV-2 infection status.** We use two-sided Chi-Square tests with the Yate's correction to conduct between-group comparisons, without adjustment for multiple testing. We defined a post-vaccine symptom reaction as significant if reported as a non-injection site symptom that was: (i) moderate to severe in degree and lasting <2 days, or (ii) of any severity and lasting >2 days.

|                           | <b>After Dose 1 (n=839)</b> | <b>After Dose 2 (n=76)</b> | <b>P value</b> |
|---------------------------|-----------------------------|----------------------------|----------------|
| No Prior Infection, n (%) | 223 (25.0%)                 | 524 (58.7%)                | <0.001         |
| Prior Infection, n (%)    | 28 (36.8%)                  | 39 (51.3%)                 | 0.082          |

**Supplementary Table 10. Types of symptoms reported following vaccine dose 1, by prior SARS-CoV-2 infection status.** We use two-sided Chi-Square tests with the Yate's correction to conduct between-group comparisons, without adjustment for multiple testing.

|                                                        | No Prior Infection<br>(n=893) | Prior Infection<br>(n=76) | P value |
|--------------------------------------------------------|-------------------------------|---------------------------|---------|
| <b>Symptom, n (%)</b>                                  |                               |                           |         |
| Fatigue or Malaise                                     | 138 (15.5%)                   | 15 (19.7%)                | 0.41    |
| Headache, Dizziness or Lightheadedness                 | 105 (11.8%)                   | 9 (11.8%)                 | 1.00    |
| Fever or Chills                                        | 35 (3.9%)                     | 10 (13.2%)                | 0.001   |
| Muscle, Bone, Joint or Nerve Symptoms                  | 69 (7.7%)                     | 10 (13.2%)                | 0.15    |
| Nausea, Vomiting, Diarrhea or Other Digestive Symptoms | 13 (1.5%)                     | 2 (2.6%)                  | 0.75    |
| Sleep Changes                                          | 17 (1.9%)                     | 3 (3.9%)                  | 0.43    |
| Swollen Lymph Nodes, Skin, Nail or Facial Changes      | 6 (0.7%)                      | 1 (1.3%)                  | 1.00    |
| Eye, Ear, Mouth or Throat Changes                      | 13 (1.5%)                     | 1 (1.3%)                  | 1.00    |
| Cough, Chest or Breathing Symptoms                     | 10 (1.1%)                     | 1 (1.3%)                  | 1.00    |
| Memory of Mood Changes                                 | 7 (0.8%)                      | 1 (1.3%)                  | 1.00    |

**Supplementary Table 11. Types of symptoms reported following dose 2, by prior SARS-CoV-2 infection status.** We use two-sided Chi-Square tests with the Yate's correction to conduct between-group comparisons, without adjustment for multiple testing.

|                                                        | No Prior Infection<br>(n=893) | Prior Infection<br>(n=76) | P value |
|--------------------------------------------------------|-------------------------------|---------------------------|---------|
| <b>Symptom, n (%)</b>                                  |                               |                           |         |
| Fatigue or Malaise                                     | 412 (46.1%)                   | 31 (40.8%)                | 0.44    |
| Headache, Dizziness or Lightheadedness                 | 274 (30.7%)                   | 13 (17.1%)                | 0.018   |
| Fever or Chills                                        | 254 (28.4%)                   | 22 (28.9%)                | 1.00    |
| Muscle, Bone, Joint or Nerve Symptoms                  | 215 (24.1%)                   | 18 (23.7%)                | 1.00    |
| Nausea, Vomiting, Diarrhea or Other Digestive Symptoms | 67 (7.5%)                     | 5 (6.6%)                  | 0.95    |
| Sleep Changes                                          | 77 (8.6%)                     | 5 (6.6%)                  | 0.69    |
| Swollen Lymph Nodes, Skin, Nail or Facial Changes      | 41 (4.6%)                     | 1 (1.3%)                  | 0.29    |
| Eye, Ear, Mouth or Throat Changes                      | 16 (1.8%)                     | 2 (2.6%)                  | 0.94    |
| Cough, Chest or Breathing Symptoms                     | 16 (1.8%)                     | 0 (0.0%)                  | 0.48    |
| Memory of Mood Changes                                 | 21 (2.4%)                     | 3 (3.9%)                  | 0.64    |
